# Supplementary material
Source: ML conference proceedings conference paper supplement (https://openaccess.thecvf.com/content/cvpr_2017/html/Zhao_Physics_Inspired_Optimization_2017_CVPR_paper.html)
Supplement: Supplementary file 2 [file Zhao_Physics_Inspired_Optimization_2017_CVPR_supplemental.zip.zip]

Archive with 16 entries (16 files):
- supplementary_material_id17/readme.txt
- supplementary_material_id17/supplementary material.pdf
- supplementary_material_id17/video-a.wmv
- supplementary_material_id17/video-b.wmv
- supplementary_material_id17/video-c.wmv
- supplementary_material_id17/video-d.wmv
- supplementary_material_id17/video-e.wmv
- supplementary_material_id17/video-f.wmv
- supplementary_material_id17/video-g1.wmv
- supplementary_material_id17/video-g2.wmv
- supplementary_material_id17/video-h1.wmv
- supplementary_material_id17/video-h2.wmv
- supplementary_material_id17/video-i.wmv
- supplementary_material_id17/video-j.wmv
- supplementary_material_id17/video-k.wmv
- supplementary_material_id17/video-l.wmv
