# Supplementary material
Source: ML conference proceedings conference paper supplement (https://openaccess.thecvf.com/content/cvpr_2017/html/Zhao_Physics_Inspired_Optimization_2017_CVPR_paper.html)
Supplement: Supplementary file 2 [file Zhao_Physics_Inspired_Optimization_2017_CVPR_supplemental.zip.zip › supplementary_material_id17/readme.txt]

All videos are in '.wmv' format.

They can be palyed by Windows built-in 'Media Player'.

Tested on Windows 7/8/10.
